## CORRECTION

# Correction: The histone acetyltransferase HBO1 promotes efficient tip cell sprouting during angiogenesis

Zoe L. Grant<sup>1,2,\*</sup>, Peter F. Hickey<sup>1,2</sup>, Waruni Abeysekera<sup>1,2</sup>, Lachlan Whitehead<sup>1,2</sup>, Sabrina M. Lewis<sup>1,2</sup>, Robert C. A. Symons<sup>3,4,5</sup>, Tracey M. Baldwin<sup>1</sup>, Daniela Amann-Zalcenstein<sup>1,2</sup>, Alexandra L. Garnham<sup>1,2</sup>, Shalin H. Naik<sup>1,2</sup>, Gordon K. Smyth<sup>1,6</sup>, Tim Thomas<sup>1,2</sup>, Anne K. Voss<sup>1,2,†,§</sup> and Leigh Coultas<sup>1,2,†,§</sup>

<sup>1</sup>The Walter and Eliza Hall Institute of Medical Research, 1G Royal Parade, Parkville, Victoria 3052, Australia. <sup>2</sup>Department of Medical Biology, University of Melbourne, Parkville, VIC 3052, Australia. <sup>3</sup>Department of Optometry and Vision Sciences, University of Melbourne, Parkville 3010, Australia. <sup>4</sup>Department of Surgery, University of Melbourne, Parkville 3010, Australia. <sup>5</sup>Department of Ophthalmology, Royal Melbourne Hospital, Parkville 3050, Australia. <sup>6</sup>School of Mathematics and Statistics, University of Melbourne, Parkville, VIC 3010, Australia.

\*Present address: Gladstone Institutes, San Francisco, CA 94158, USA.

†These authors contributed equally to this work

§Authors for correspondence (avoss@wehi.edu.au; lcoultas@wehi.edu.au)

### Author contributions

Conceptualization: Z.L.G., A.K.V., L.C.; Methodology: R.C.A.S., S.H.N.; Software: L.W.; Formal analysis: Z.L.G., P.F.H., W.A., A.L.G., A.K.V., L.C.; Investigation: Z.L.G., S.M.L., T.M.B.; Resources: R.C.A.S., T.T.; Writing - original draft: Z.L.G., A.K.V., L.C.; Writing - review & editing: Z.L.G., A.K.V., L.C.; Supervision: D.A.-Z., G.K.S., A.K.V., L.C.; Funding acquisition: A.K.V., L.C.

### Funding

This work was supported by the National Health and Medical Research Council, Australia (Project Grants 1084248 and 1143612 to A.K.V. and T.T., and 1124812 to S.H.N.; Research Fellowships 1081421 to A.K.V., 1154970 to G.K.S. and 1003435 to T.T.; Investigator Grant 1176789 to A.K.V.); the Australian Research Council (Future Fellowships: 110100891 to L.C.); the L.E.W. Carty Charitable Fund (L.C.); an Australian Government Research Training Program Scholarship (to Z.L.G.); and the Royal Melbourne Hospital Neuroscience Foundation (R.C.A.S.).

There was an error in Development (2021) **148**, dev199581 (doi:10.1242/dev.199581).

Shalin H. Naik was inadvertently omitted from the author list. The complete list of authors, their affiliations, contributions and funding information are shown above.

The corresponding authors apologise to readers and to Shalin H. Naik for this error. Both the online full text and PDF versions of the paper have been corrected.
